# Supplementary material
Source: publisher site journal article supplement (https://www.dovepress.com/article/611287)
Supplement: Supplementary file 1 [file 611287%20Revised%20Supplementary%20Table.docx]

Supplementary Table 1. Treatment allocation and follow-up duration according to renal C3 deposition status among patients with available follow-up data

| Characteristic | Renal C3 deposition–negative group (n=16) | Renal C3 deposition–positive group (n=577) |
| --- | --- | --- |
| Follow-up duration, months, median (IQR) | 100.0 (27.0–134.3) | 54.0 (26.0–85.0) |
| Kidney-protective therapy, n (%) | 5 (31.3%) | 358 (62.0%) |
| Corticosteroid or immunosuppressive therapy, n (%) | 6 (37.5%) | 351 (60.8%) |

Data are presented as median (interquartile range) or number (percentage). Kidney-protective therapy was defined as treatment with a renin-angiotensin system inhibitor, mineralocorticoid receptor antagonist, or sodium-glucose cotransporter 2 inhibitor.
